# Supplementary material
Source: HighWire-hosted journal article supplement (http://ajnr-stage2.highwire.org/highwire/filestream/71075/field_highwire_adjunct_files/0/19-00684.pdf)
Supplement: 19-00684.pdf [file 19-00684.pdf]

**On-line Table: Characteristics of included studies<sup>3-9</sup>**

| Variable                                                    | Value      |
|-------------------------------------------------------------|------------|
| Quality score                                               |            |
| Mean +/— SD                                                 | 15.3 ± 2.1 |
| Range                                                       | 13–18      |
| 13–15 (No.) (%)                                             | 4 (57)     |
| 16–18 (No.) (%)                                             | 3 (43)     |
| Multicentric (No.) (%)                                      | 0 (0)      |
| Monocentric (No.) (%)                                       | 7 (100)    |
| Design                                                      |            |
| Cohort of healthy children (No.) (%)                        | 5 (71)     |
| Research controls (No.) (%)                                 | 2 (29)     |
| Patient enrollment                                          |            |
| Prospective (No.) (%)                                       | 0 (0)      |
| Retrospective (No.) (%)                                     | 7 (100)    |
| Consecutive (No.) (%)                                       | 7 (100)    |
| Nonconsecutive (No.) (%)                                    | 7 (100)    |
| Description of population                                   |            |
| Sources and method of selection (No.) (%)                   | 7 (100)    |
| Baseline characteristics described (No.) (%)                | 7 (100)    |
| Outcome assessment                                          |            |
| Independent/blinded clinical outcome assessment (No.) (%)   | 6 (86)     |
| Outcome clearly defined (No.) (%)                           | 6 (86)     |
| Evaluation of study limitations                             |            |
| Imprecision and source of potential bias assessed (No.) (%) | 3 (43)     |
| Study objectives or prespecified hypotheses (No.) (%)       | 7 (100)    |
